# Supplementary material for: Oxidovanadium(V) Schiff Base Complexes Derived from Chiral 3-amino-1,2-propanediol Enantiomers: Synthesis, Spectroscopic Studies, Catalytic and Biological Activity
Source: MDPI journal article supplement (doi:10.3390/ijms25095010), 2024-05-03

Figure S1. The IR spectra of oxidovanadium(V) complexes.

**[(+) $\text{VOL}^1$ ]**

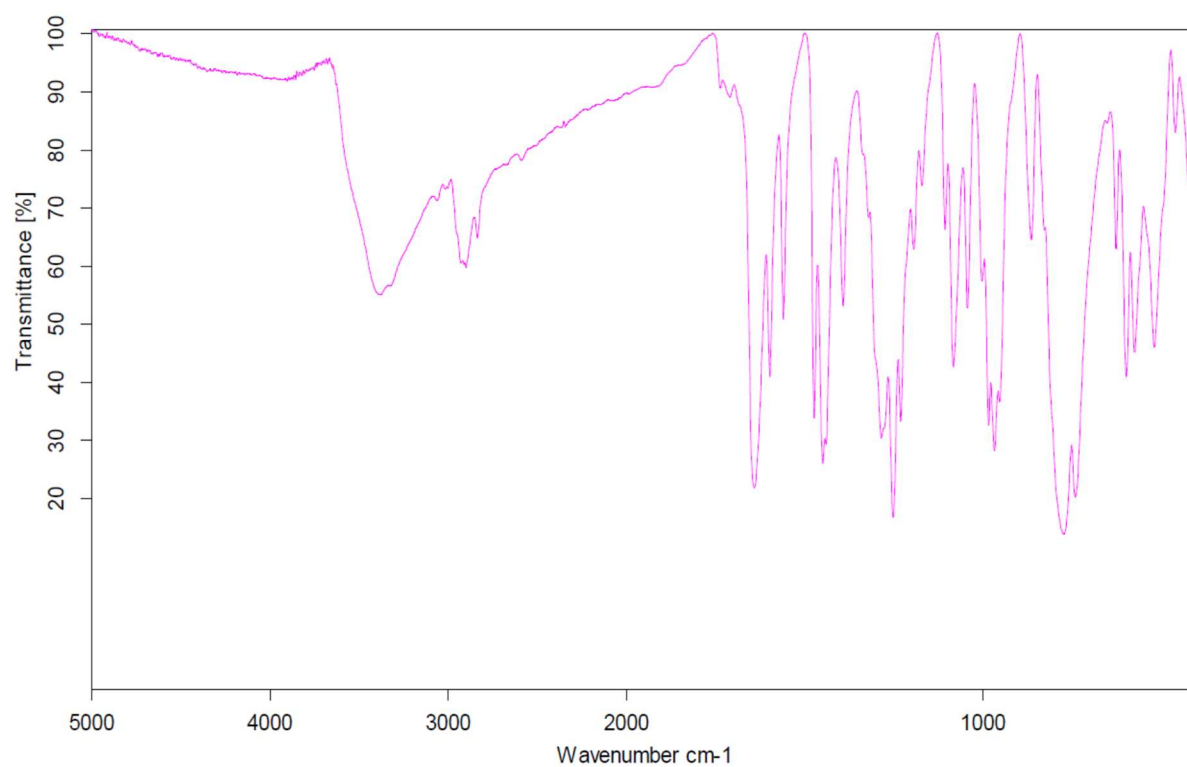

**[(+) $\text{VOL}^2$ ]**

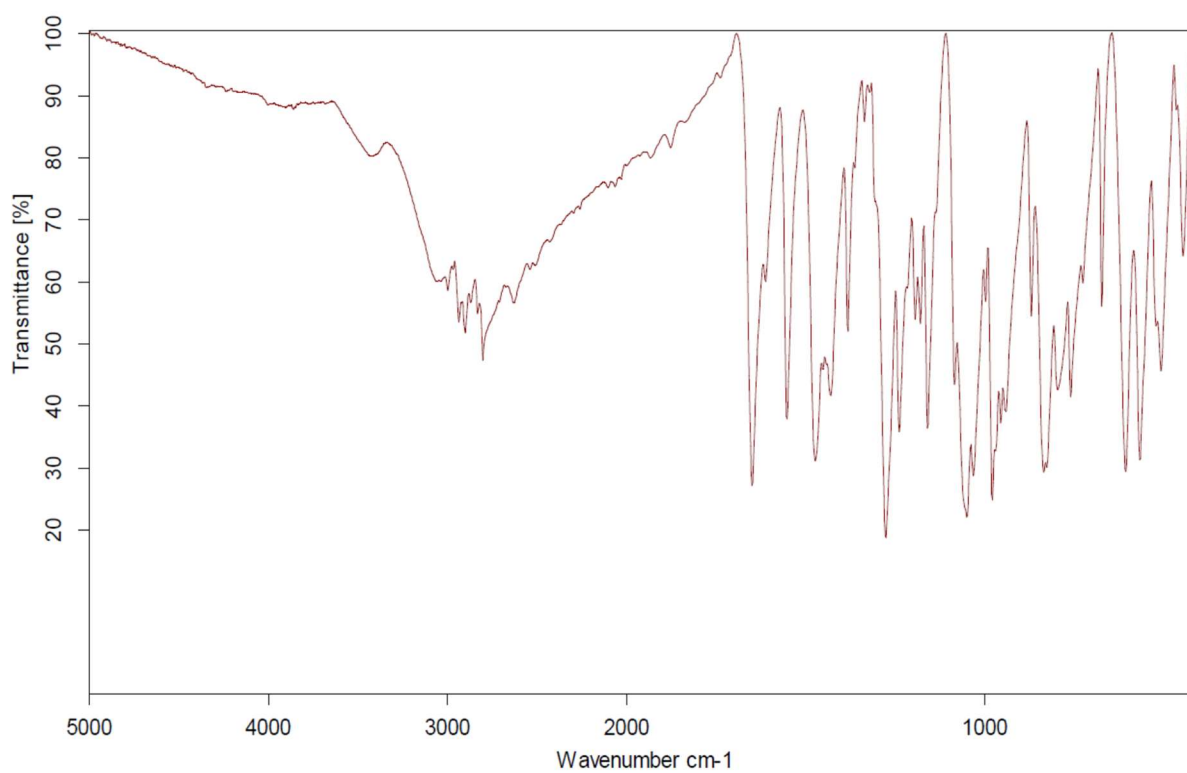

**[(+)-VOL<sup>3</sup>]**

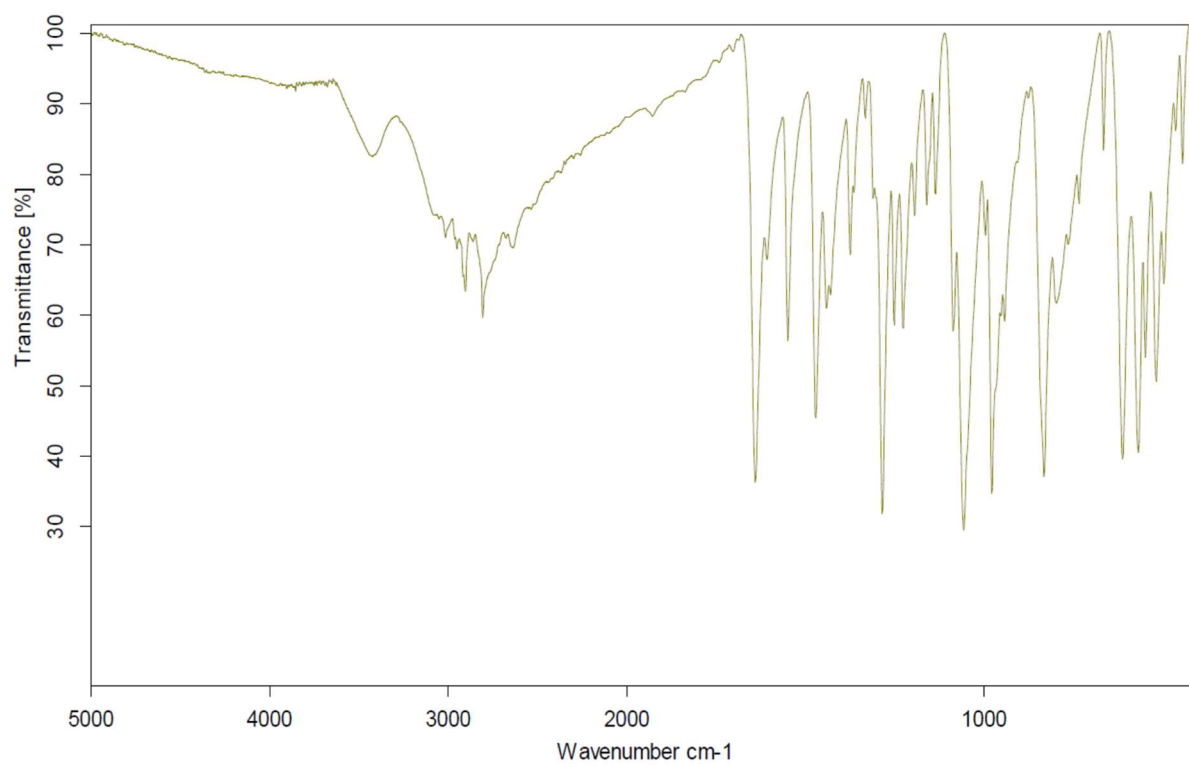

**[(+)-VOL<sup>4</sup>]**

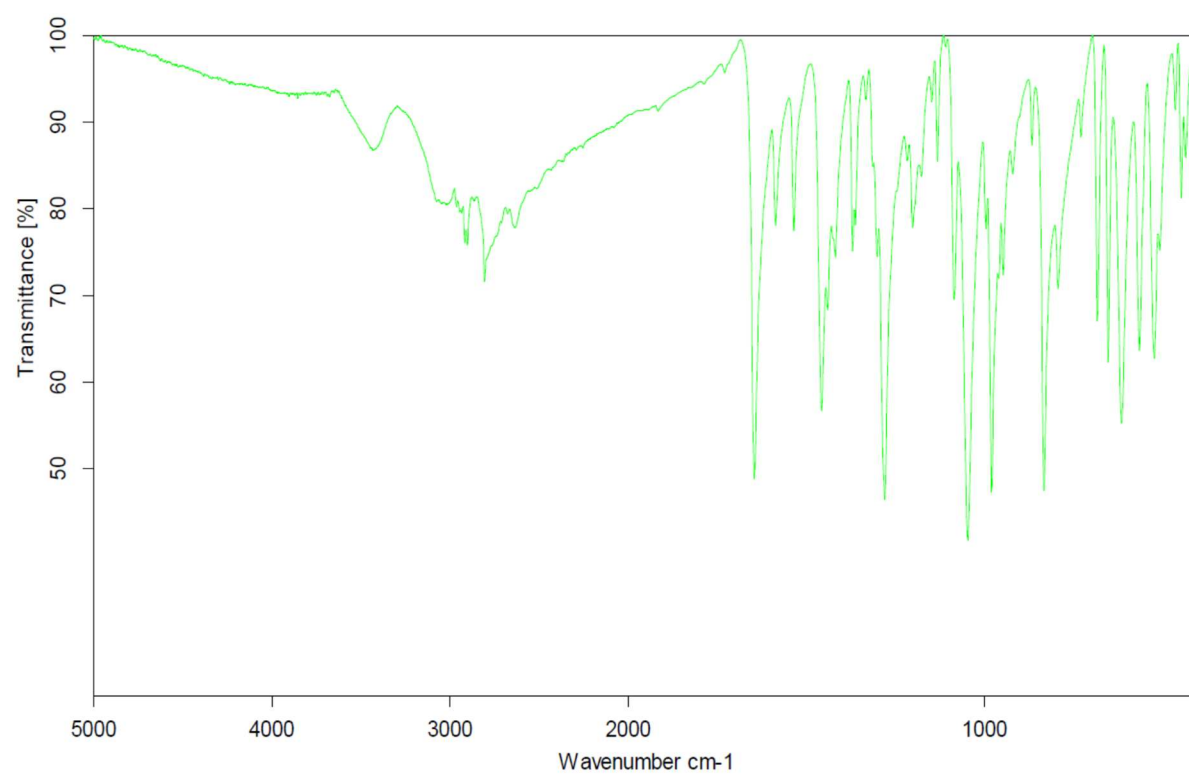

**[(+)-VOL<sup>5</sup>]**

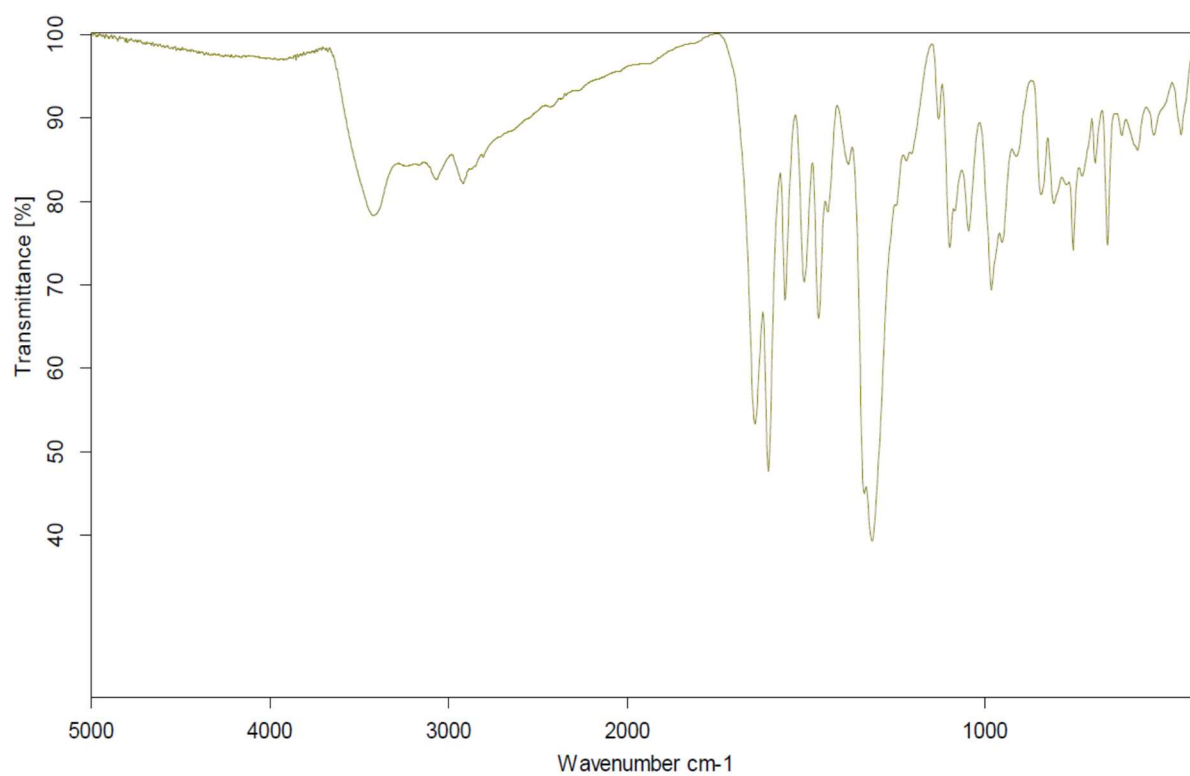

**[(-)-VOL<sup>1</sup>]**

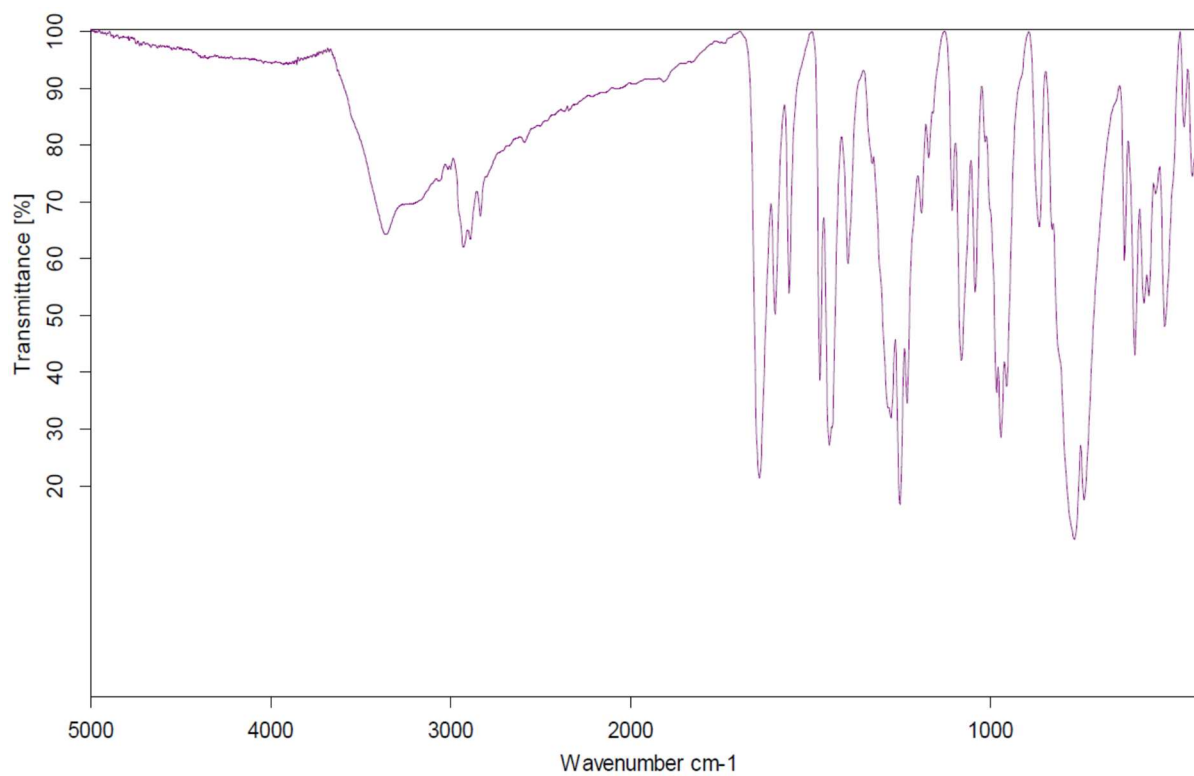

**[(-)VOL<sup>2</sup>]**

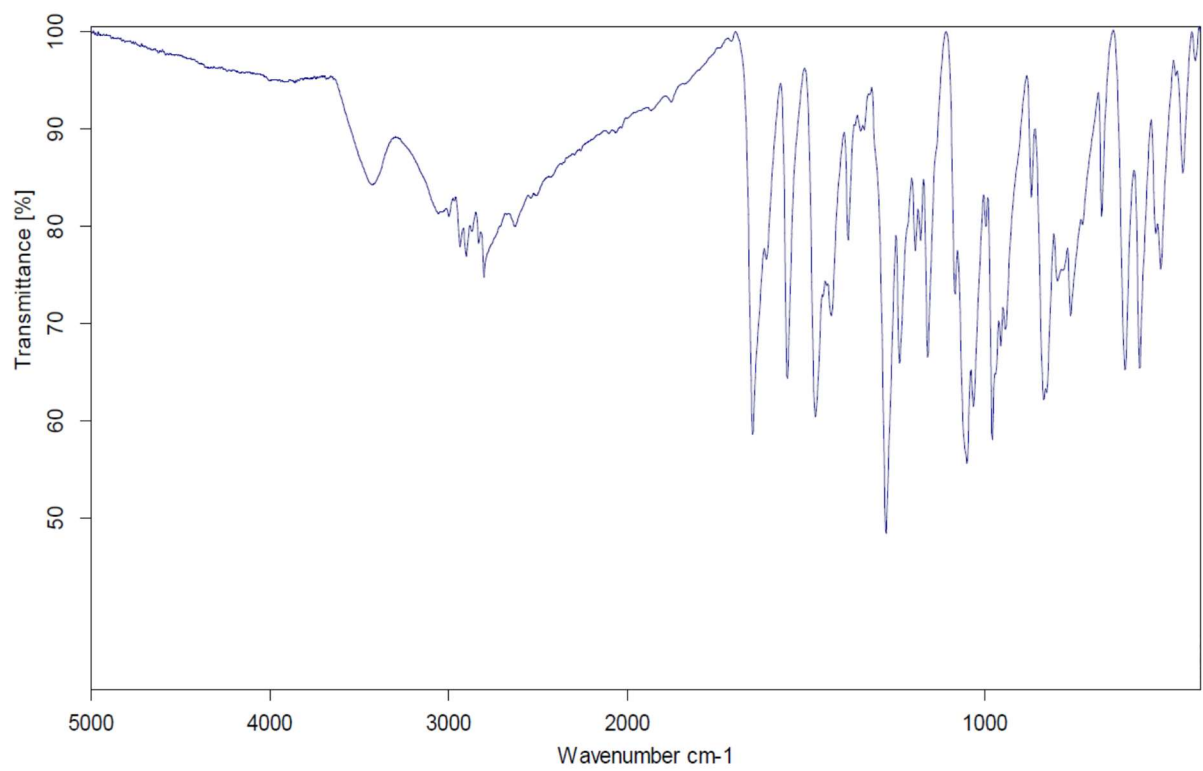

**[(-)VOL<sup>3</sup>]**

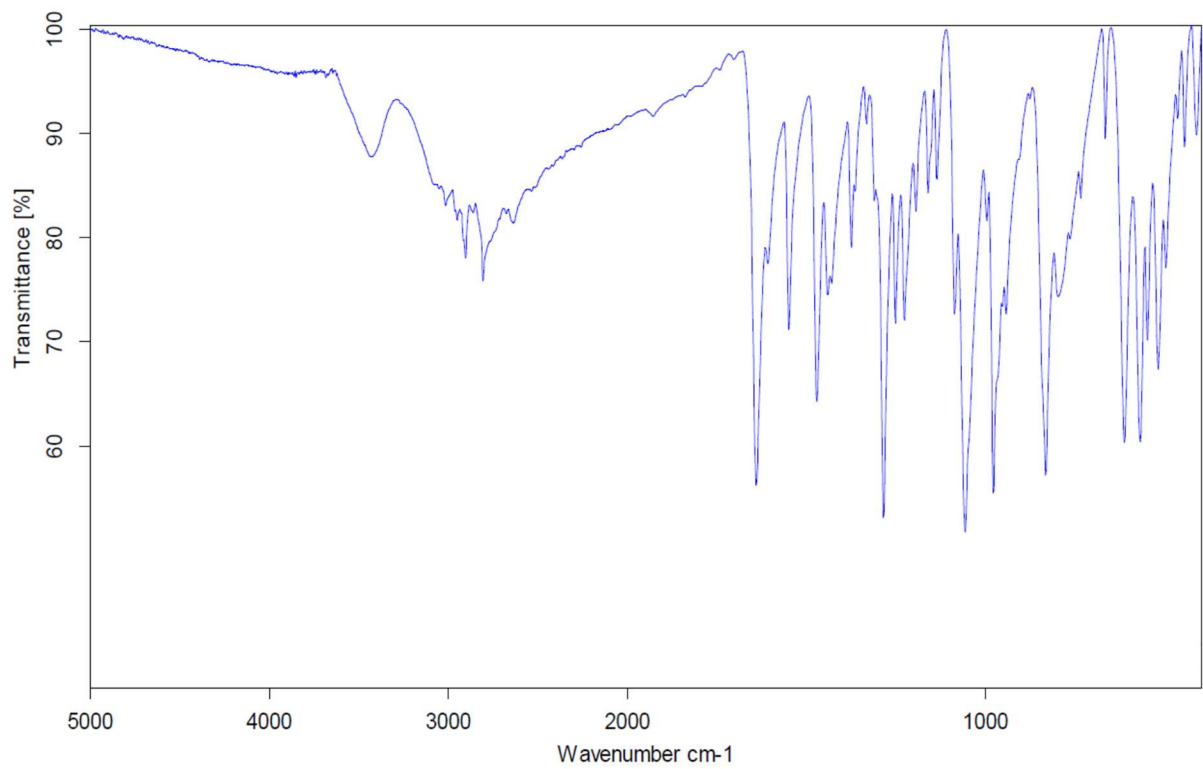

**[(-)VOL<sup>4</sup>]**

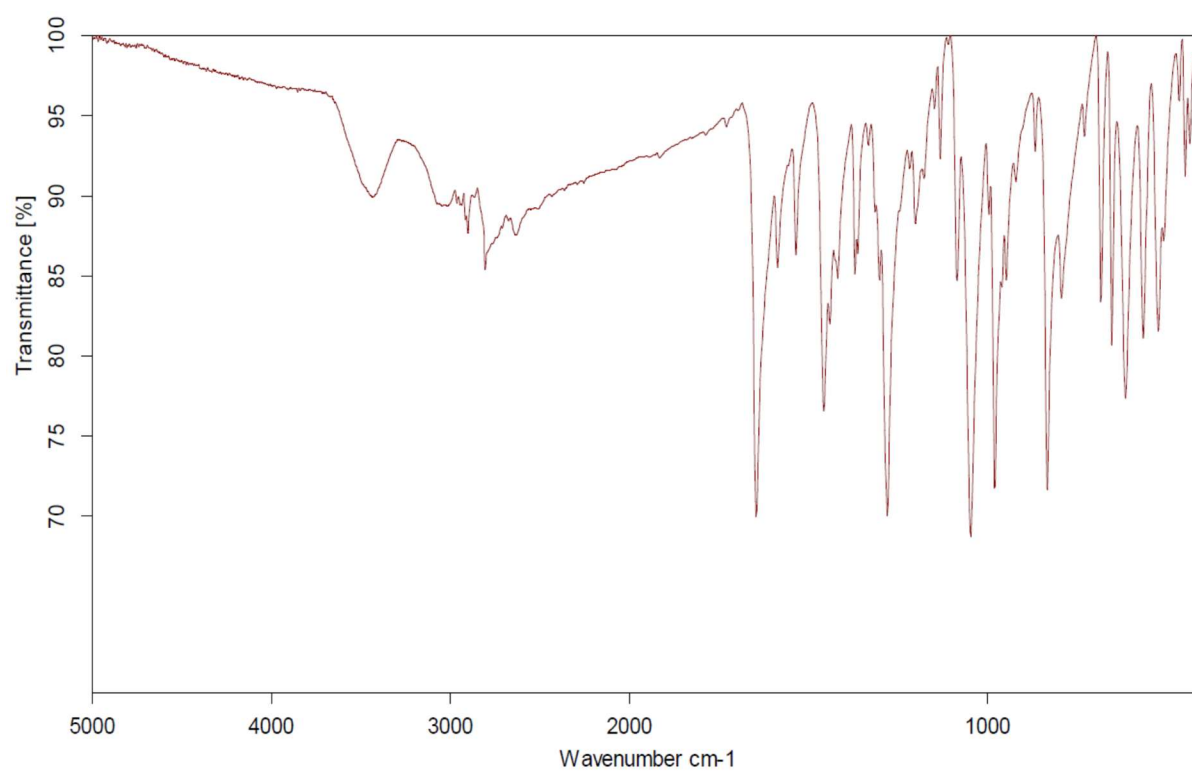

**[(-)VOL<sup>5</sup>]**

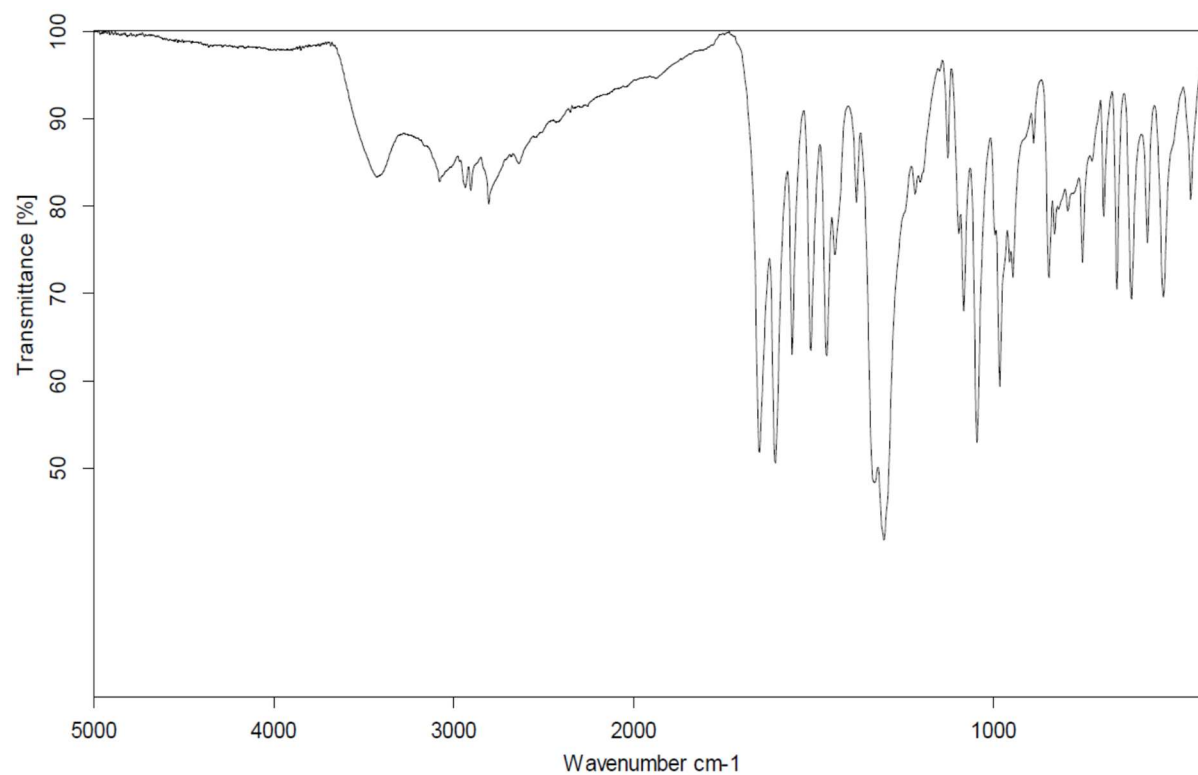

Figure S2. The UV-Vis spectra of **[(+) $\text{VOL}^4$ ]** and **[(-) $\text{VOL}^4$ ]** complexes.

**[(+) $\text{VOL}^4$ ]**

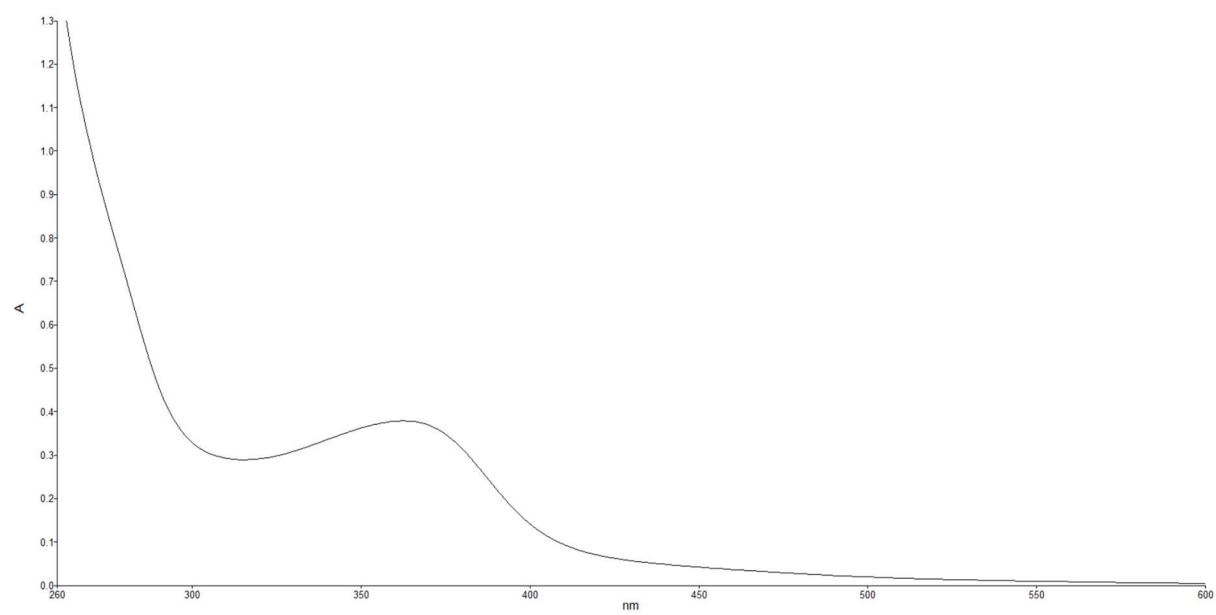

**[(-) $\text{VOL}^4$ ]**

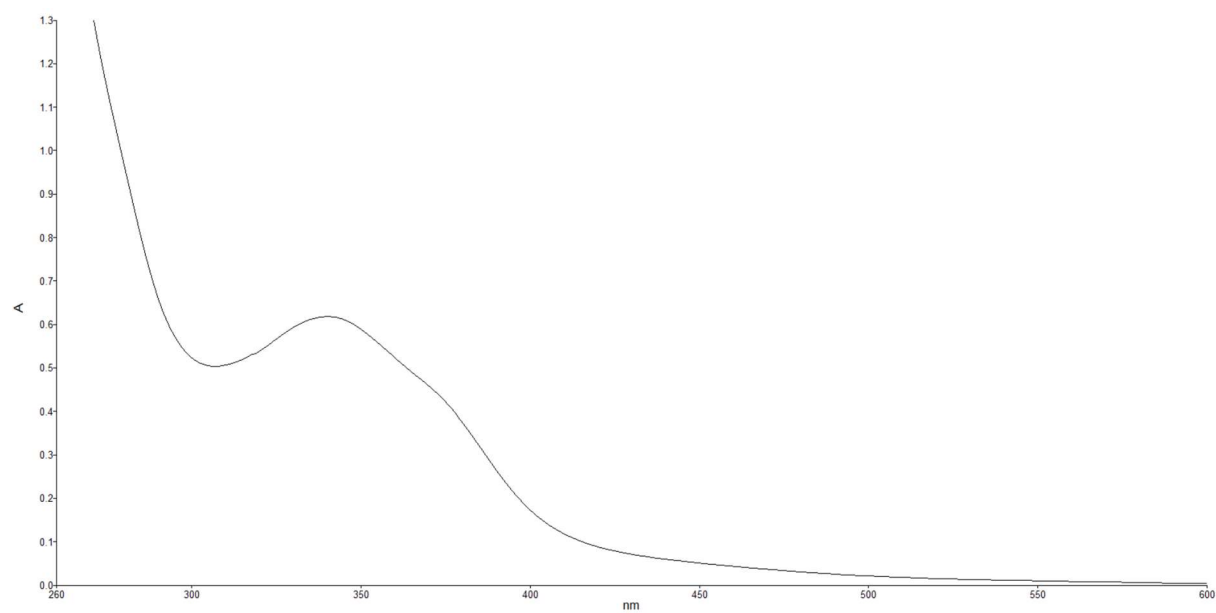

Figure S3. The CD spectra of [(+)**VOL**<sup>4</sup>] and [(-)**VOL**<sup>4</sup>] complexes.

[(+)**VOL**<sup>4</sup>]

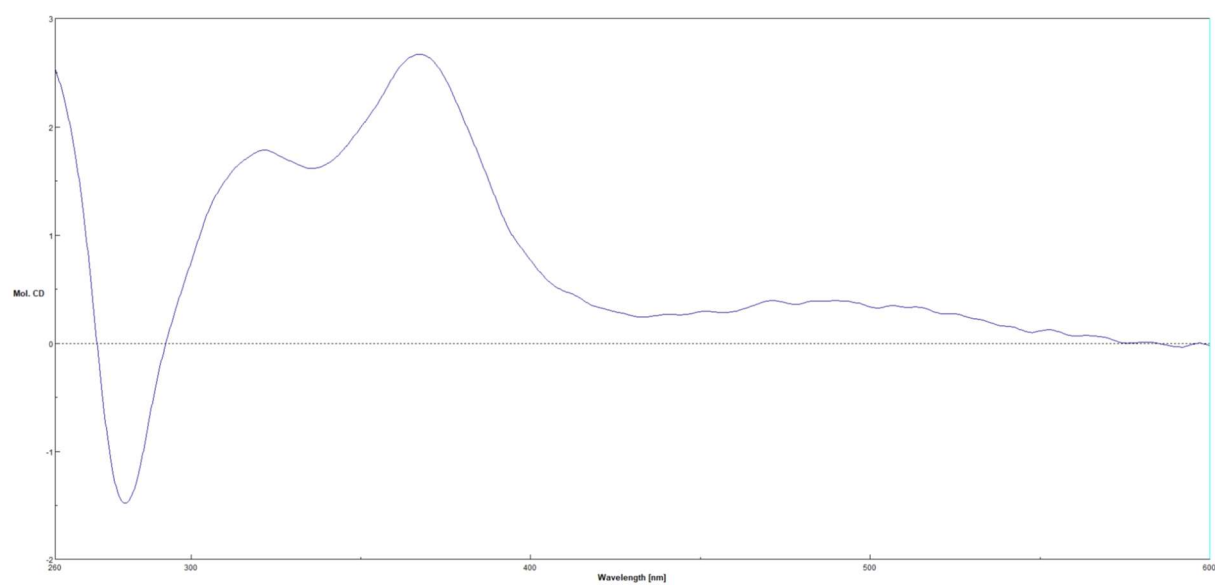

[(-)**VOL**<sup>4</sup>]

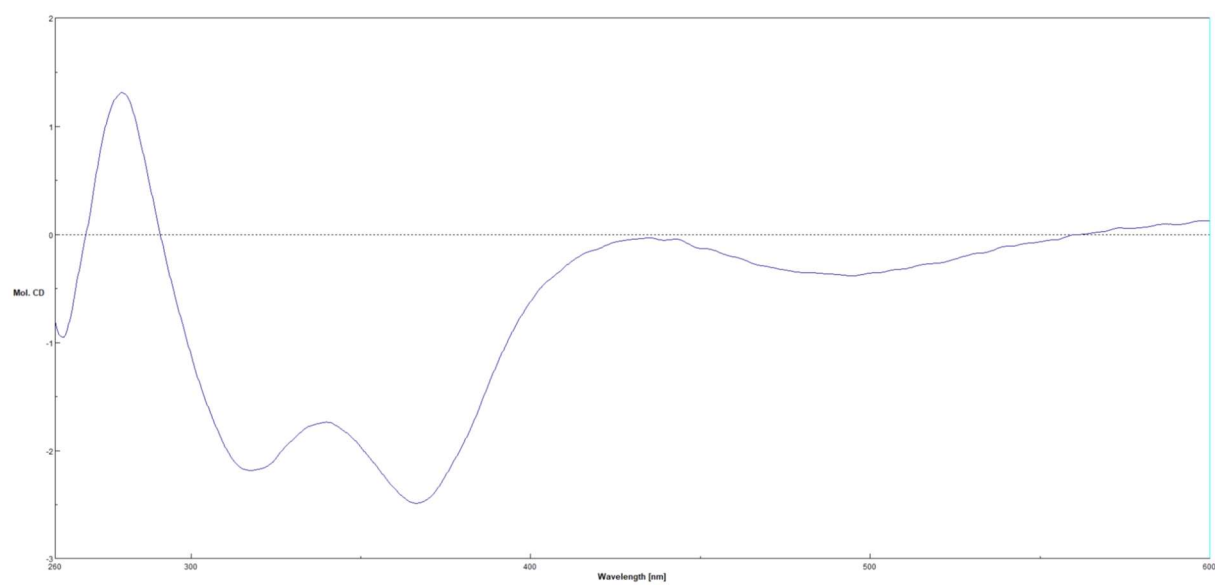

Figure S4. a)  $^1\text{H}$ ,  $^{51}\text{V}$ , COSY and NOESY NMR spectra of the **[(+) $\text{VOL}^4$ ]** complex.

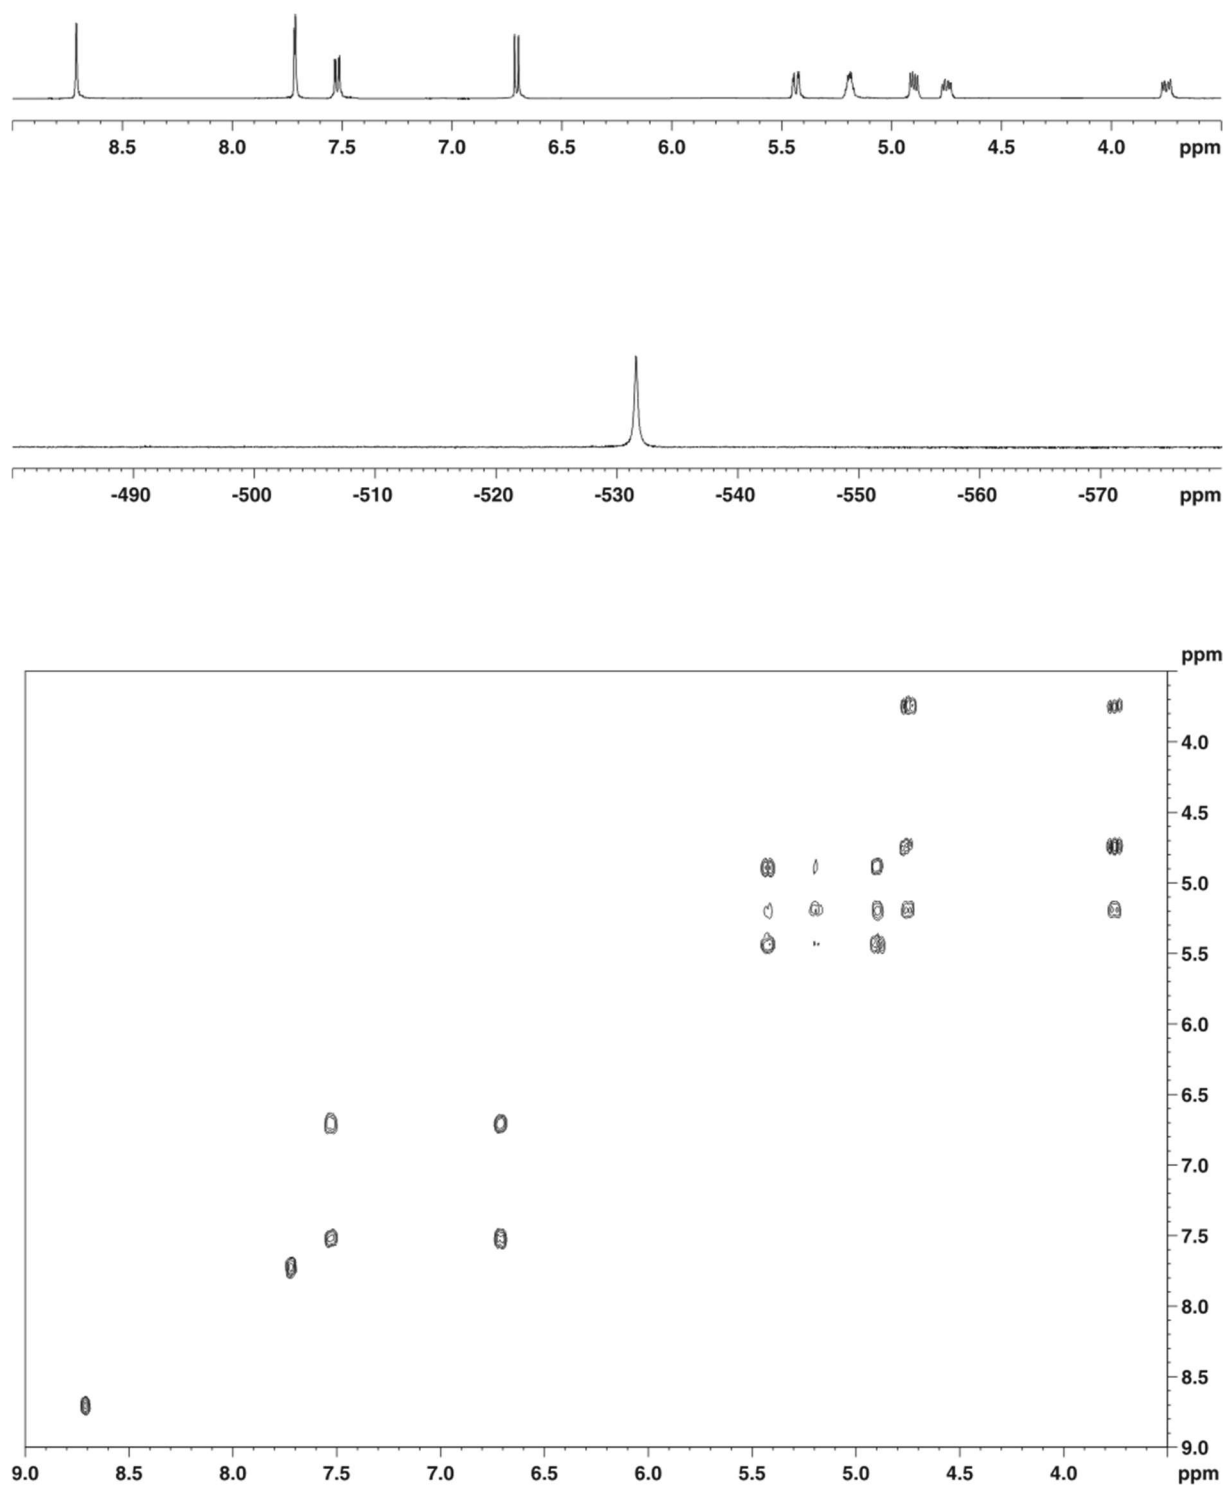



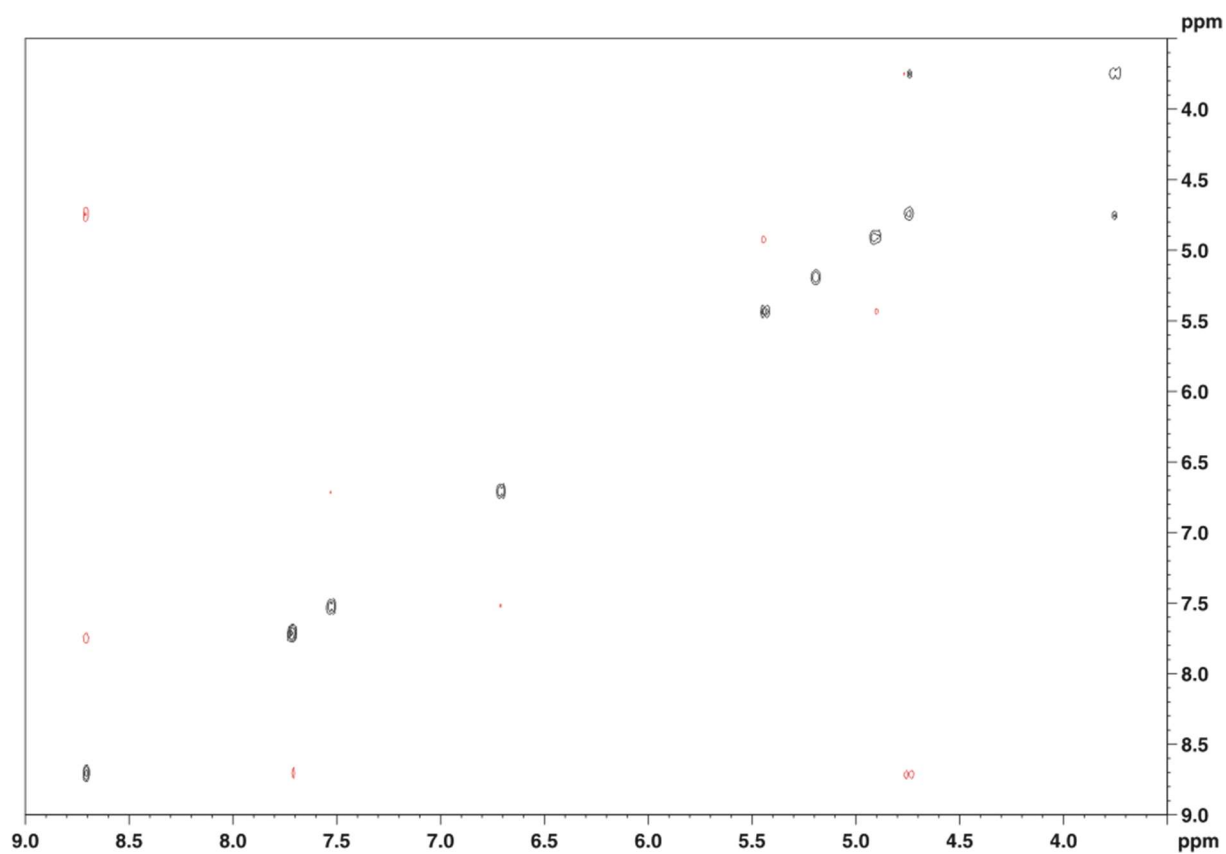

b)  $^1\text{H}$  and  $^{51}\text{V}$  NMR spectra of the **[(+) $\text{VOL}^1$ ]**, **[(+) $\text{VOL}^2$ ]**, **[(+) $\text{VOL}^3$ ]**, **[(+) $\text{VOL}^5$ ]** complexes.

**[(+) $\text{VOL}^1$ ]**

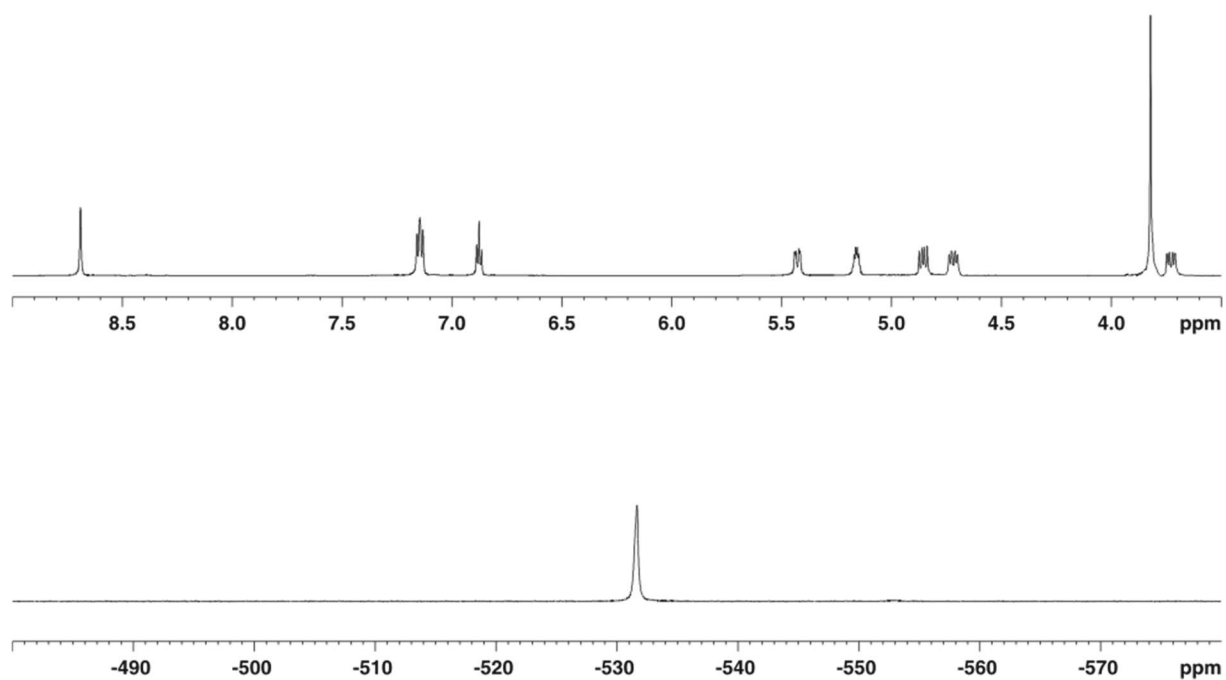

**[(+) $\text{VOL}^2$ ]**

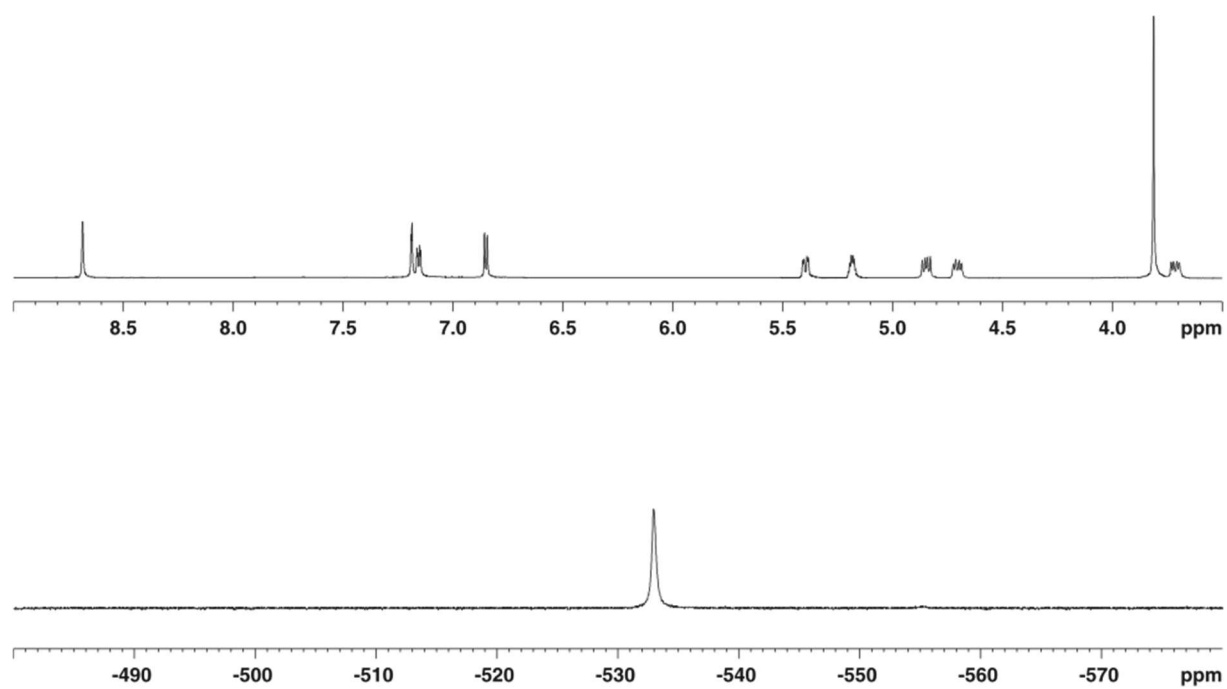

**[(+) $\text{VOL}^3$ ]**

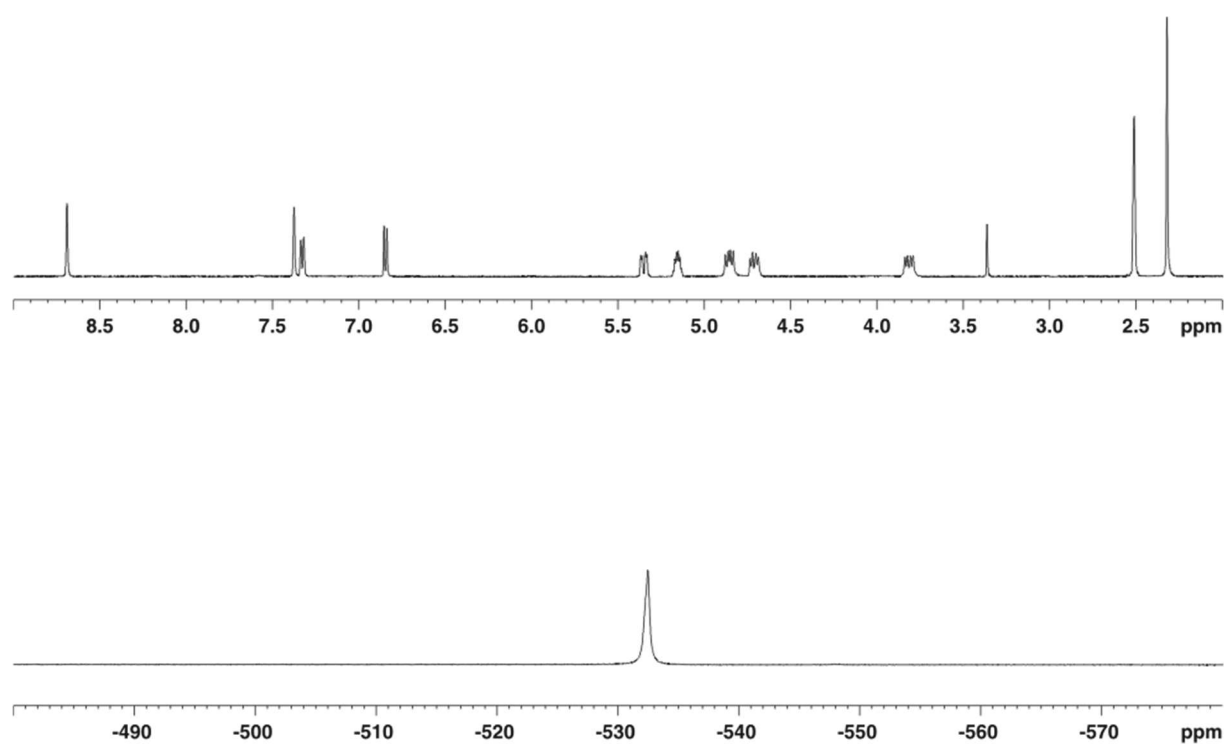

**[(+) $\text{VOL}^5$ ]**

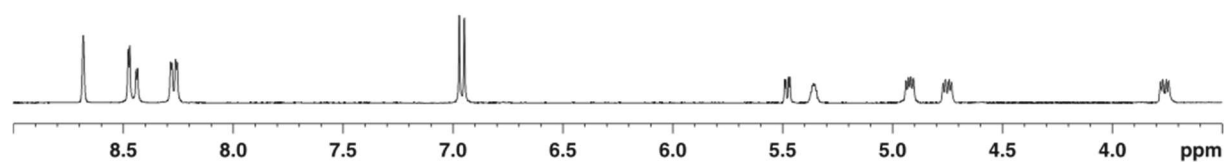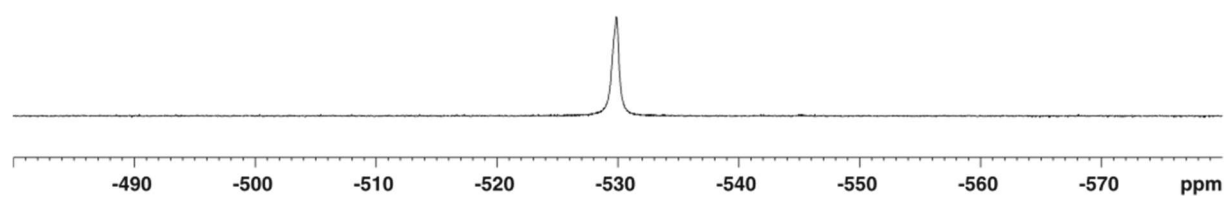

Figure S5. Images of a) [(+)**VOL**<sup>4</sup>] and b) [(-)**VOL**<sup>4</sup>] compounds.

a)

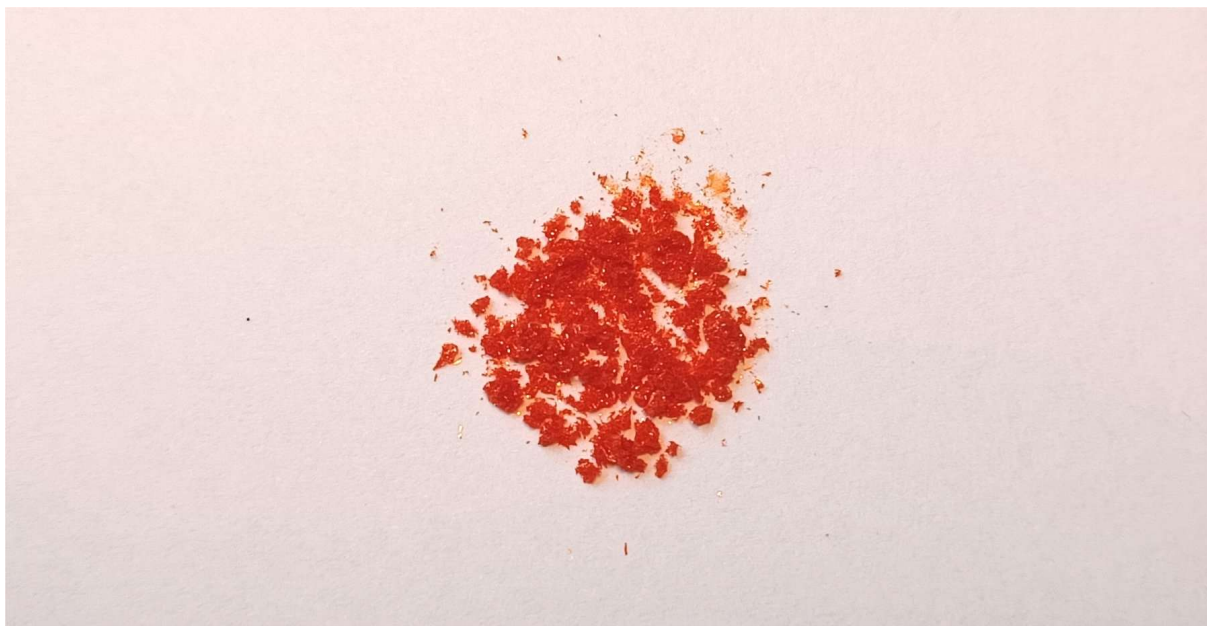

b)

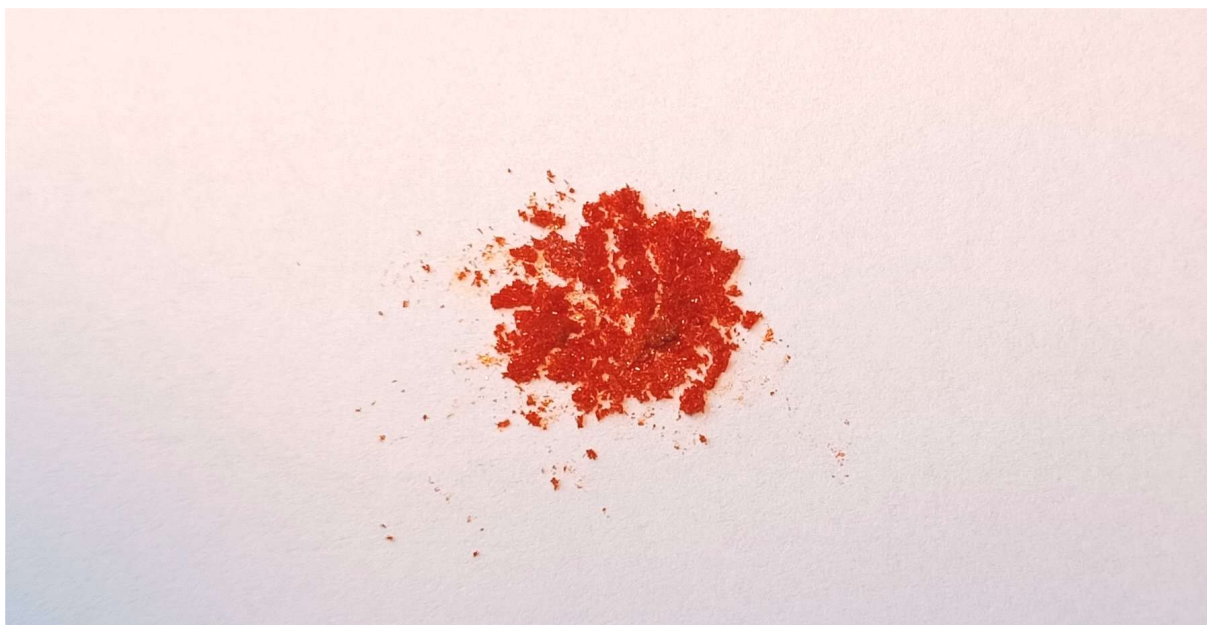

Supplement: s1 [file s1]
